# Supplementary material for: How Extreme Droughts Change the Impact of Eutrophic Reservoir on Its Outflow, with Special References to Planktonic Cyanobacteria and Their Secondary Metabolites?
Source: Preprints.org preprint supplement (doi:10.20944/preprints202410.1003.v1), 2024-10-15
Supplement: Supplementary file 2 [file supplementary]

**Table S1.** Comparison of the sum of monthly and annual rainfall from periods of floods (2009, 2010) and drought (2015, 2018, 2020); data for the Białystok station located 60 km from the Siemianówka dam reservoir [46]

|  |  | **2009** | **2010** | **2015** | **2018** | **2020** |
| --- | --- | --- | --- | --- | --- | --- |
|  | J | 30,97 | 32,25 | 27 | 86,86 | 24,63 |
|  | F | 30,47 | 28,69 | 8,64 | 16 | 60,2 |
|  | M | 57,66 | 27,93 | 33,27 | 12,7 | 23,56 |
|  | A | 4,83 | 36,08 | 34,29 | 51,56 | 5,86 |
|  | M | 82,04 | 104,89 | 104,91 | 31,24 | 73,67 |
|  | J | 145,31 | 113,8 | 25,9 | 22,09 | 144,28 |
|  | J | 97,54 | 122,94 | **63,76** | **144,52** | **43,69** |
|  | A | 79,76 | 115,34 | **7,36** | **26,41** | **102,11** |
|  | S | 24,15 | 15,24 | 34,29 | 40,13 | 23,61 |
|  | O | 66,79 | 27,67 | 36,07 | 40,64 | 86,1 |
|  | N | 43,68 | 81,56 | 79,51 | 19,56 | 20,34 |
|  | D | 46,22 | 34,8 | 176,8 | 77,98 | 69,58 |
|  | totaly | **709,42** | **741,19** | **631,8** | **569,69** | **677,63** |
| June-August | summer | **322,61** | **352,08** | **97,02** | **193,02** | **290,08** |
